# Supplementary material for: Aphids on Aphid-Susceptible Cultivars Have Easy Access to Turnip Mosaic Virus, and Effective Inoculation on Aphid-Resistant Cultivars of Oilseed Rape (Brassica napus)
Source: MDPI journal article supplement (doi:10.3390/plants12101972), 2023-05-13
Supplement: s1 [file s1]

## Supplementary material

**Table S1. The definitions of the waveforms scored in the electropenetrography (EPG) analyses.**

| Acronym                         | Variable type | Definition                                                           |
|---------------------------------|---------------|----------------------------------------------------------------------|
| <i>General</i>                  |               |                                                                      |
| n_Pr                            | Frequency     | Number of probes                                                     |
| s_Pr                            | Time          | Total probing time                                                   |
| s_nE                            | Time          | Total duration of the no phloematic phase                            |
| s_np                            | Time          | Total time of the non-probing intervals                              |
| s_np.1E                         | Time          | Duration of the nonprobe period before the 1 <sup>st</sup> E         |
| t_1E2rec                        | Time          | Time from the start of EPG to the 1 <sup>st</sup> E2                 |
| t_1Erec                         | Time          | Time from the start of EPG to the 1 <sup>st</sup> E                  |
| <i>Surface-mesophyll (Leaf)</i> |               |                                                                      |
| t_1Pr                           | Time          | Time to the first probe from the start of EPG                        |
| n_bPr                           | Frequency     | Number of short probes (C < 3 minutes)                               |
| n_Pr.1E1                        | Frequency     | Number of probes before the 1 <sup>st</sup> E1                       |
| t_1C.1pd                        | Time          | Time from the beginning of the 1 <sup>st</sup> probe to the first pd |
| n_pd                            | Frequency     | Number of pd                                                         |
| s_pd                            | Time          | Total duration of pd                                                 |
| t_1EinPr                        | Time          | Time from the beginning of that probe to the 1 <sup>st</sup> E       |
| s_C                             | Time          | Total C duration with pd                                             |
| %probtimeinC                    | Index         | % of probing spent in C                                              |
| <i>Phloem</i>                   |               |                                                                      |
| s_E                             | Time          | Total duration of the E phases                                       |
| n_E1                            | Frequency     | Number of E1 periods                                                 |
| s_E1                            | Time          | Total duration of E1                                                 |

|                    |       |                                                                                    |
|--------------------|-------|------------------------------------------------------------------------------------|
| d_E1followedby1sE2 | Time  | Duration of the E1 followed by the first sustained E2 (> 10 min)                   |
| s_E1followedbysE2  | Time  | Total duration of E1 followed by sustained E2 (> 10 min)                           |
| %_E1/E12           | Index | Relative amount of E1 on E12                                                       |
| s_E2               | Time  | Total duration of E2 periods                                                       |
| s_longestE2        | Time  | Duration of the longest E2                                                         |
| E2index            | Index | phloemian index: % of the time of the E2 after the start of the 1 <sup>st</sup> E2 |
| %sE2/E2            | Index | Relative amount of sE2 on E2                                                       |
| %proptimeinE1      | Index | % of probing spent in E1                                                           |
| %proptimeinE2      | Index | % of probing spent in E2                                                           |

**Table S2. The main variables of the *Brevicoryne brassicae* feeding behavior without significant difference between mock-inoculated and uninoculated plants on two oilseed rape cultivars.**

| Variable <sup>a</sup> | Cultivar        |               |                 |               |
|-----------------------|-----------------|---------------|-----------------|---------------|
|                       | Deleyou6        |               | Zhongshuang11   |               |
|                       | Mock-inoculated | uninoculated  | Mock-inoculated | uninoculated  |
| <i>Overview</i>       |                 |               |                 |               |
| n_Pr                  | 9.35±1.39       | 9.40±1.30     | 14.70±1.82      | 16.05±1.68    |
| s_Pr(s)               | 24651.52±868.   | 25245.99±858. | 26706.21±300.   | 26499.59±330. |
|                       | 06              | 69            | 27              | 30            |
| s_np(s)               | 603.24±9.38     | 625.99±13.42  | 1820.34±264.7   | 2165.59±299.7 |
|                       |                 |               | 7               | 2             |
| s_np.1E(s)            | 565.83±17.46    | 572.71±17.20  | 1381.80±260.0   | 1348.07±225.3 |

|                  |               |               |               |               |
|------------------|---------------|---------------|---------------|---------------|
|                  |               |               | 6             | 6             |
| s_nE(s)          | 11857.36±687. | 11971.27±744. | 18122.14±158  | 18216.98±138  |
|                  | 43            | 12            | 4.99          | 6.48          |
| t_1E2.rec(s)     | 11060.70±1107 | 12258.04±116  | 16144.02±184  | 15401.84±183  |
|                  | .31           | 6.64          | 3.19          | 9.12          |
| t_1Erec(s)       | 10969.90±109  | 11124.74±974. | 13198.30±154  | 13563.89±127  |
|                  | 1.69          | 30            | 2.12          | 4.34          |
| <i>Surface</i>   |               |               |               |               |
| t_1Pr(s)         | 142.12±12.01  | 166.14±15.74  | 402.78±53.98  | 400.73±46.50  |
| <i>Mesophyll</i> |               |               |               |               |
| t_1C.1pd(s)      | 309.93±55.01  | 357.67±49.65  | 426.06±43.59  | 391.42±54.01  |
| n_bPr            | 1.75±0.47     | 1.95±0.39     | 3.25±0.50     | 3.20±0.63     |
| n_pd             | 83.65±7.48    | 91.25±7.11    | 96.00±9.32    | 101.40±10.60  |
| s_pd(s)          | 453.27±43.70  | 466.21±47.70  | 841.95±85.15  | 880.26±106.77 |
| n_Pr_1E1         | 6.60±0.69     | 6.35±0.41     | 5.00±0.58     | 6.05±0.67     |
| t_1EinPr(s)      | 3535.31±133.5 | 3621.19±156.0 | 3728.27±341.1 | 3561.33±404.8 |
|                  | 7             | 7             | 7             | 1             |
| s_C(s)           | 12325.42±109  | 12589.79±951. | 17707.84±134  | 17262.92±119  |
|                  | 4.15          | 51            | 6.55          | 0.56          |
| %probtimeinC(%)  | 52.61±3.76    | 52.76±3.22    | 76.27±5.14    | 72.50±5.65    |
| <i>Phloem</i>    |               |               |               |               |
| s_E(s)           | 13127.24±834. | 13304.47±773. | 6582.47±1447. | 6624.15±1248. |

|                  | 05            | 09            | 55            | 00            |
|------------------|---------------|---------------|---------------|---------------|
| n_E1             | 1.20±0.16     | 1.40±0.17     | 2.40±0.43     | 1.85±0.29     |
| s_E1(s)          | 88.98±5.85    | 91.43±3.97    | 314.60±32.10  | 344.36±38.55  |
| %_E1/E12(%)      | 0.81±0.07     | 0.96±0.09     | 29.39±5.95    | 29.33±4.92    |
| d_E1followedby1s | 74.37±3.77    | 80.17±3.63    | 84.06±3.88    | 81.13±4.29    |
| E2(s)            |               |               |               |               |
| s_E1followedbysE | 95.96±7.50    | 97.06±6.46    | 150.44±7.88   | 159.31±7.51   |
| 2(s)             |               |               |               |               |
| %probtimeinE1(%) | 0.37±0.05     | 0.37±0.05     | 0.95±0.16     | 1.09±0.17     |
| s_E2(s)          | 13141.15±952. | 13874.04±101  | 7411.50±1392. | 7756.34±1507. |
|                  | 43            | 0.31          | 52            | 32            |
| s_longestE2(s)   | 11905.99±805. | 12113.24±926. | 6906.80±1400. | 6294.55±1355. |
|                  | 27            | 72            | 80            | 10            |
| E2index(%)       | 85.85±2.58    | 86.92±2.27    | 57.57±7.29    | 58.33±5.71    |
| %sE2/E2(%)       | 97.44±1.24    | 97.62±1.36    | 54.63±8.29    | 52.72±8.25    |
| %probtimeinE2(%) | 47.22±3.70    | 49.42±3.22    | 21.79±5.24    | 19.65±5.26    |

<sup>a</sup> The values in the table show mean±standard error (SE). The data were compared using the student *t* test (for Gaussian variables) or the Mann–Whitney *U* test (for non-Gaussian variables) after the square-root transformation for frequency variables, natural log transformation for time variables, and square arcsine for percentage variables. The significance level was chosen at  $P < 0.05$ . The acronym of the variables was defined in Table S1.

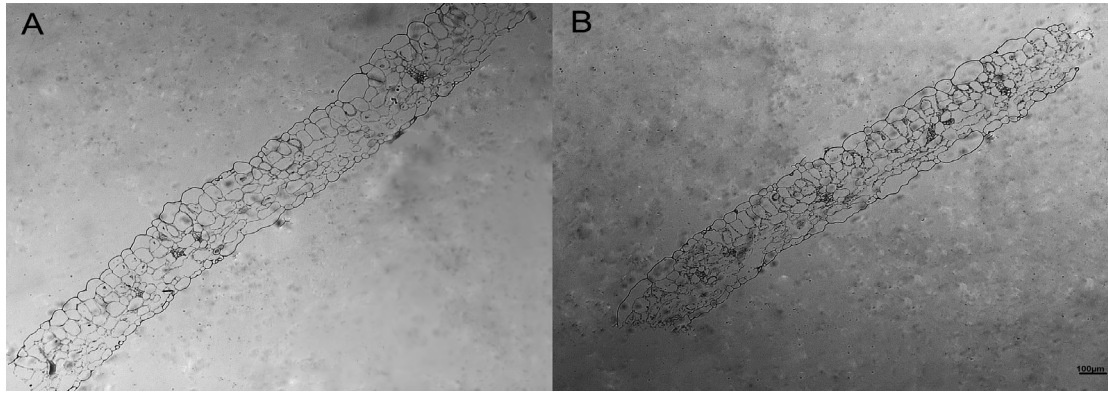

Figure S1. The anatomical structures of leaves of the two oilseed rape cultivars. The upper-most first leaf of each cultivar was fixed and photographed using semi-thin Sect. (3–4  $\mu\text{m}$ ) immediately after EPG recording ended. **(A)** Zhongshuang11; **(B)** Deleyou6. (Bar =100  $\mu\text{m}$ ).
